# Supplementary material for: Behaviour change intervention for smokeless tobacco cessation: its development, feasibility and fidelity testing in Pakistan and in the UK
Source: Springer Nature journal article supplement (doi:10.1186/s12889-016-3177-8), 2016-06-10
Supplement: MOESM2 [file 10244100]

Additional file 4: Data on fidelity to Behavioural Support Intervention

| Behavioural Support Intervention ingredients | Constituent BCTs                                                                                                                                                                             | Implementation status<br>N (%) receiving the ingredient<br>(Sample N= 32) |                       |                 |                     |
|----------------------------------------------|----------------------------------------------------------------------------------------------------------------------------------------------------------------------------------------------|---------------------------------------------------------------------------|-----------------------|-----------------|---------------------|
|                                              |                                                                                                                                                                                              | Fully implemented                                                         | Partially implemented | Not implemented | Missing information |
| <b>Adherence to content</b>                  |                                                                                                                                                                                              |                                                                           |                       |                 |                     |
| Identify product                             | RI1: Assess current and past tobacco use behaviour                                                                                                                                           | 27 (84.4)                                                                 | 5 (15.6)              | 0               | 0                   |
| Explain what the product contains            | BM1: Provide information on consequences of tobacco use                                                                                                                                      | 24 (75.0)                                                                 | 7 (21.9)              | 1 (3.1)         | 0                   |
| Identify harmful ingredients                 | BM1: Provide information on consequences of tobacco use<br>5.2: Salience of consequences                                                                                                     | 24 (75.0)                                                                 | 5 (15.6)              | 3 (9.4)         | 0                   |
| Myths                                        | 5.1: Information about health consequences of tobacco use<br>5.2: Salience of consequences<br>4.3: Re-attribution: elicit perceived causes of behaviour and suggest alternative explanations | 27 (84.4)                                                                 | 5 (15.6)              | 0               | 0                   |
| Importance scale                             | RI2: Assess current readiness and ability to stop<br>BM9: Identify reasons for wanting and not wanting to stop tobacco use                                                                   | 19 (59.4)                                                                 | 12 (37.5)             | 1 (3.1)         | 0                   |
| Benefits of stopping                         | BM9: Identify reasons for wanting and not wanting to stop tobacco use                                                                                                                        | 24 (75.0)                                                                 | 8 (25.0)              | 0               | 0                   |

|                                          |                                                                                                                                                                                                                                                                              |           |           |           |         |
|------------------------------------------|------------------------------------------------------------------------------------------------------------------------------------------------------------------------------------------------------------------------------------------------------------------------------|-----------|-----------|-----------|---------|
|                                          | 13.2: Framing/re-framing: Suggest the deliberate adoption of a perspective on behaviour (e.g. its purpose) in order to change cognitions or emotions about performing the behaviour                                                                                          |           |           |           |         |
| Assess past quit attempts                | RI3: Assess past history of quit attempts<br>BM2: Boost motivation and self-efficacy<br>15.3: Focus on past success                                                                                                                                                          | 20 (62.5) | 3 (9.4)   | 8 (25.0)  | 1 (3.1) |
| Confidence scale                         | RI2: Assess current readiness and ability to stop<br>15.3: Focus on past success                                                                                                                                                                                             | 19 (59.4) | 12 (37.5) | 1 (3.1)   | 0       |
| Help is available                        | BM2: Boost motivation and self-efficacy<br>BM10: Explain the importance of abrupt cessation<br>RC4: Explain expectations regarding treatment programme<br>15.3: Focus on past success                                                                                        | 19 (59.4) | 6 (18.8)  | 6 (18.8)  | 1 (3.1) |
| Social norms                             | BM5: Provide normative information about others behaviour and experiences<br>4.3: Re-attribution                                                                                                                                                                             | 16 (50.0) | 6 (18.8)  | 10 (31.3) | 0       |
| Set quit date (preparation and planning) | BM6: Prompt commitment from the client there and then<br>BS3: Facilitate action planning/develop treatment plan<br>BS8: Advise on environmental restructuring<br>12.3: Avoidance/reducing exposure to cues for the behaviour<br>4.4: Instruction on how to perform behaviour | 20 (62.5) | 5 (15.6)  | 7 (21.9)  | 0       |

|                                              |                                                                                                                                                                                                                                                                                                                                |           |           |           |           |
|----------------------------------------------|--------------------------------------------------------------------------------------------------------------------------------------------------------------------------------------------------------------------------------------------------------------------------------------------------------------------------------|-----------|-----------|-----------|-----------|
| Nicotine dependence and triggers information | <p>Inform about the nature of nicotine dependence (no label)</p> <p>Identify pattern of tobacco use (no label)</p> <p>BS4: Facilitate goal setting</p> <p>BS1: Facilitate barrier identification</p> <p>4.2: Inform about antecedents</p>                                                                                      | 10 (31.3) | 12 (37.5) | 10 (31.3) | 0         |
| Managing triggers                            | <p>BS3: Facilitate action planning/develop treatment plan</p> <p>BS1: Facilitate problem solving</p> <p>BS7: Advise on changing routine</p> <p>8.2: Behaviour substitution</p> <p>12.4: Distraction: Advise to use alternative focus for attention to avoid triggers for chewing</p> <p>BS9: Advise on setting graded task</p> | 27 (84.4) | 4 (12.5)  | 1 (3.1)   | 0         |
| Setting rewards and offering client booklet  | <p>10.7: Self-incentive</p> <p>RC5: Offer/direct towards appropriate written materials</p>                                                                                                                                                                                                                                     | 16 (50.0) | 13 (40.6) | 3 (9.4)   | 0         |
| Readiness scale                              | <p>RI2: Assess current readiness and ability to stop</p> <p>13.2: Framing and re-framing: Suggest that they might think of quitting as reducing the risk of consequences from continuing chewing (rather than just the benefits of stopping)</p>                                                                               | 18 (56.3) | 2 (6.3)   | 0         | 12 (37.5) |
| Strengthen ex-user identity                  | <p>BM8: Strengthen ex-user identity</p> <p>13.2: framing/re-framing: Encourage them to reframe in their mind why they wanted to stop in</p>                                                                                                                                                                                    | 18 (56.3) | 0         | 2 (6.3)   | 12 (37.5) |

|                                                                                                                    |                                                                                                                                                                                                                                        |           |          |         |           |
|--------------------------------------------------------------------------------------------------------------------|----------------------------------------------------------------------------------------------------------------------------------------------------------------------------------------------------------------------------------------|-----------|----------|---------|-----------|
|                                                                                                                    | the first place<br>13.1: Encourage identification of self as a role model 'who used to chew': Inform that their own behaviour may be an example to others                                                                              |           |          |         |           |
| Withdrawal symptoms information                                                                                    | RC6: Provide information on withdrawal symptoms                                                                                                                                                                                        | 15 (46.9) | 5 (15.6) | 0       | 12 (37.5) |
| Managing withdrawals                                                                                               | BS1: Facilitate barrier identification and problem solving<br>BS3: Facilitate action planning/develop treatment plan<br>BS4: Facilitate goal setting<br>8.2: Behaviour substitution<br>12.4: Distraction<br>15.4: Self-talk (positive) | 18 (56.3) | 0        | 2 (6.3) | 12 (37.5) |
| Monitoring progress                                                                                                | BS4: Facilitate goal setting<br>BS6: Prompt self-recording                                                                                                                                                                             | 19 (59.4) | 0        | 1 (3.1) | 12 (37.5) |
| Determine clients abstinence status                                                                                | BM2: Boost motivation and self-efficacy                                                                                                                                                                                                | 18 (56.3) | 1 (3.1)  | 1 (3.1) | 12 (37.5) |
| Provide rewards                                                                                                    | 10.9: Self-reward                                                                                                                                                                                                                      | 17 (53.1) | 0        | 3 (9.4) | 12 (37.5) |
| Discuss withdrawal symptoms                                                                                        | RI4: Assess withdrawal symptoms<br>BS2: Facilitate relapse prevention and coping                                                                                                                                                       | 15 (46.9) | 3 (9.4)  | 2 (6.3) | 12 (37.5) |
| <b>Quality of delivery</b>                                                                                         |                                                                                                                                                                                                                                        |           |          |         |           |
| Establish a positive , friendly and professional relationship with the client and foster a sense that the client's | RC1: Build general Rapport                                                                                                                                                                                                             | 25 (78.1) | 5 (15.6) | 2 (6.3) | 0         |

|                                                                                                                                                                      |                                                  |           |          |           |   |
|----------------------------------------------------------------------------------------------------------------------------------------------------------------------|--------------------------------------------------|-----------|----------|-----------|---|
| experiences are understood                                                                                                                                           |                                                  |           |          |           |   |
| Give general reassurance to the client that his/her experiences are normal and time limited                                                                          | RC10: Provide reassurance                        | 24 (75.0) | 0        | 8 (25.0)  | 0 |
| Prompt questions from the client and answer clearly and accurately                                                                                                   | RC2: Elicit and answer Questions                 | 24 (75.0) | 6 (18.8) | 2 (6.3)   | 0 |
| Adopt a style of interaction that involves listening carefully to the client and where appropriate reflecting back to the client key elements of what s/he is saying | RC7: Use reflective listening                    | 21 (65.6) | 3 (9.4)  | 8 (25.0)  | 0 |
| Provide summary of information exchanged and establish a clear confirmation of decisions made and commitments entered into                                           | RC9: Summarise info and confirm client decisions | 22 (68.8) | 1 (3.1)  | 9 (28.1)  | 0 |
| Use relevant information from the client to tailor the behavioural support provided/ flexible adaptation that takes into account individual patient needs            | RD1: Tailor interactions appropriately           | 22 (68.8) | 2 (6.3)  | 8 (25.0)  | 0 |
| Emphasise client choice within the bounds of evidence based practice                                                                                                 | RD2: Emphasise client choice                     | 21 (65.6) | 1 (3.1)  | 10 (31.3) | 0 |
